# Supplementary material for: In Vitro Digestion and Fecal Fermentation of Low-Gluten Rice and Its Effect on the Gut Microbiota
Source: MDPI journal article supplement (doi:10.3390/foods12040855), 2023-02-16
Supplement: s1 [file s1]

**Table S1.** Components of selective media

| Microbiota                     | Culture medium (g/L)                                                                                                                                                                                                                                                                                                                                                                                                                                                                                                      |
|--------------------------------|---------------------------------------------------------------------------------------------------------------------------------------------------------------------------------------------------------------------------------------------------------------------------------------------------------------------------------------------------------------------------------------------------------------------------------------------------------------------------------------------------------------------------|
| <i>Faecal coliform</i>         | Tryptone 20.0, lactose 10.0, bovine bile salt 5.0, NaCl 5.0, neutral red 0.075, agar 20.0                                                                                                                                                                                                                                                                                                                                                                                                                                 |
| <i>Lactobacillus</i>           | Tryptone 10.0, beef powder 10.0, yeast powder 5.0, glucose 20.0, Tween-80 1.0, K <sub>2</sub> HPO <sub>4</sub> 2.0, sodium acetate 5.0, trisodium citrate 2.0, magnesium sulfate 0.1, manganese sulfate 0.05, L-cysteine 0.5, agar 20.0                                                                                                                                                                                                                                                                                   |
| <i>Bacteroid</i>               | Tryptone 20.0, yeast powder 5.0, soluble starch 0.5, xylan 5, NaCl 5.0, K <sub>2</sub> HPO <sub>4</sub> 0.05, KH <sub>2</sub> PO <sub>4</sub> 0.05, L-cysteine hydrochloride 1.0, heme chloride 0.01, vitamin K1 0.002, kanamycin 0.1, vancomycin 0.0075, bromocresol violet 0.012, agar 20.0                                                                                                                                                                                                                             |
| <i>Bifidobacterium</i>         | Tryptone 15.0, dextrose 20.0, yeast powder 2.0, soluble starch 0.5, NaCl 5.0, liver extract 5.0, Tween-80 1.0, mupirocin 0.05, agar 20.0, tryptone 5.0, casein peptone 16.0, bovine brain extract 4.0, bovine heart extract 4.0                                                                                                                                                                                                                                                                                           |
| Total anaerobic bacteria       | Glucose 2.0, NaCl 5.0, Na <sub>2</sub> HPO <sub>4</sub> 2.5, agar 13.5                                                                                                                                                                                                                                                                                                                                                                                                                                                    |
| Fecal                          | Starch 6.0, arabinogalactan 1.0, pectin 2.0, xylan 1.0, glucose 0.4, yeast powder 3.0, L-cysteine 0.5, mucin 2.0, KCl 1.0, NaCl 4.5, K <sub>2</sub> HPO <sub>4</sub> 0.5, KH <sub>2</sub> PO <sub>4</sub> 0.5, CaCl <sub>2</sub> ·6H <sub>2</sub> O 0.15, MgSO <sub>4</sub> ·7H <sub>2</sub> O 0.01, FeSO <sub>4</sub> ·7H <sub>2</sub> O 0.005, heme chloride 0.025, Tween-80 1.0, bile salts 0.4, vitamin mixture 0.01, Menaquinone 1.0, D-biotin 2.0, pantothenic acid 10.0, nicotinamide 5.0, p-aminobenzoic acid 5.0 |
| <i>Akkermansia muciniphila</i> | Tryptone 5.0, casein peptone 16.0, bovine brain extract 4.0, bovine heart extract 4.0 Glucose 2.0, NaCl 5.0, Na <sub>2</sub> HPO <sub>4</sub> 2.5, mucin 2.0                                                                                                                                                                                                                                                                                                                                                              |

Note: The above medium was supplemented with low-gluten rice (LGR), common rice (CR), and rice starch (RS) all at 2 g/L.

**a**

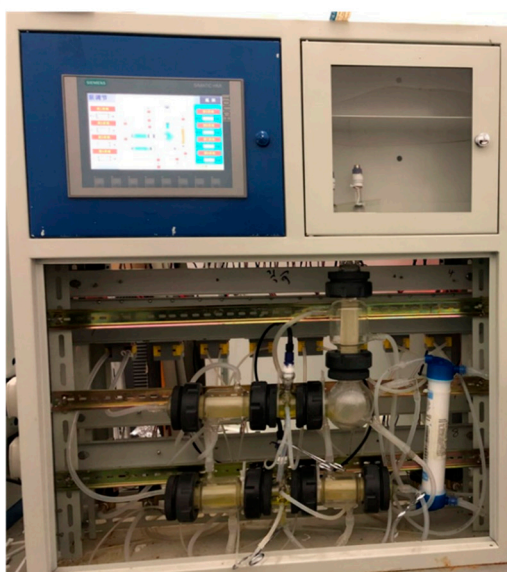

**Bionic Gastrointestinal Reactor**

**b**

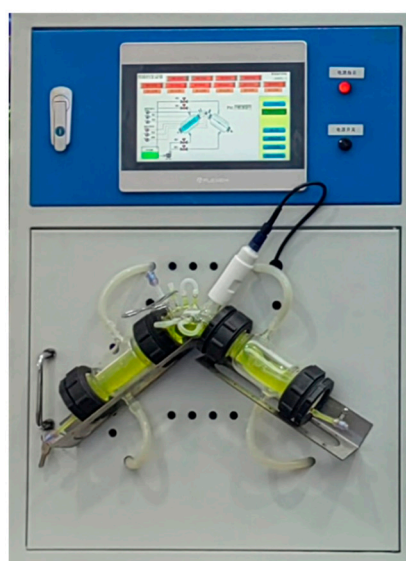

**Bionic Colon Model (BCM)**

**Figure S1.** Dynamic simulation equipment. **(a)** bionic gastrointestinal reactor (BGR); **(b)** bionic colon model (BCM).
